# Supplementary material
Source: PubMed Central journal article supplement (PMC3093306)

**Control**

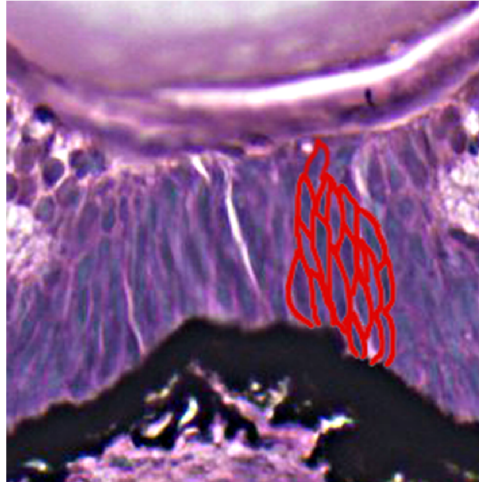

**Rx shRNA**

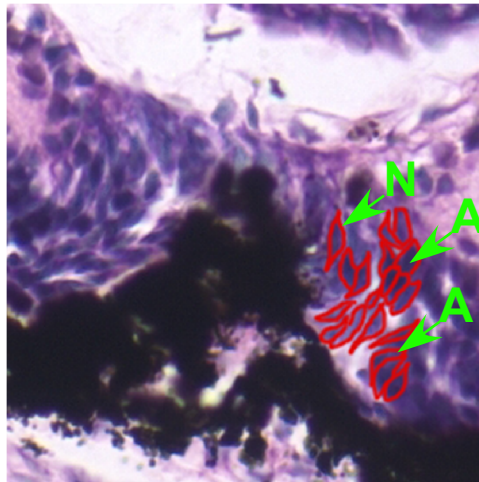

Supplement: NIHMS283324-supplement-01.pdf [file NIHMS283324-supplement-01.pdf]
